# Supplementary material
Source: PubMed Central journal article supplement (PMC6742495)

**Supplemental Table 1.** Interval Adverse Event and Dosing Adjustment Schedule Based on CTCAE v4.0, for *N*-Acetylcysteine or Placebo

| Adverse Event                                                                      | Dose Adjustment                                                                                                                                                            |
|------------------------------------------------------------------------------------|----------------------------------------------------------------------------------------------------------------------------------------------------------------------------|
| ≥Grade 2 abdominal pain associated with gargling the agent                         | Discontinue gargling the agent. Route is changed to oral swish for 60 s followed by spitting the agent; if persists, change schedule to as needed for thickened secretions |
| ≥Grade 2 gastric, esophageal, or lower gastrointestinal hemorrhage                 | Discontinue gargling the agent. Route is changed to oral swish for 60 s followed by spitting the agent; if persists, change schedule to as needed for thickened secretions |
| ≥Grade 2 gastric, esophageal, or lower intestinal ulcer                            | Discontinue gargling the agent. Route is changed to oral swish for 60 s followed by spitting the agent; if persists, change schedule to as needed for thickened secretions |
| ≥Grade 2 nausea immediately associated with gargling the agent                     | Discontinue gargling the agent. Route is changed to oral swish for 60 s followed by spitting the agent; if persists, change schedule as needed for thickened secretions    |
| ≥Grade 3 mucositis pain immediately associated with gargling or swishing the agent | Change the agent from scheduled 5 times/d to use as needed for thickened secretions                                                                                        |
| ≥Grade 2 allergic reaction                                                         | Discontinue the agent                                                                                                                                                      |

Abbreviation: CTCAE v4.0, Common Terminology Criteria for Adverse Events, version 4.0.

**Supplemental Table 2.** Linear Regression Model Results for Changes From Baseline for Both GRIX and QLQ H&N Surveys

| Dependent Variable <sup>a</sup> | Change                   | No. of Patients | Study | Arm <i>P</i> Value <sup>b</sup> | Estimate                           |
|---------------------------------|--------------------------|-----------------|-------|---------------------------------|------------------------------------|
|                                 |                          |                 | Arm   |                                 | From Lasso Regression <sup>c</sup> |
| GRIX xerostomia daytime         | Baseline to end of RT    | 20              |       | .55                             | —                                  |
|                                 | Baseline to 14 d post RT | 15              | −6.2  | .32                             | —                                  |
| GRIX xerostomia nighttime       | Baseline to end of RT    | 21              | 12.4  | .41                             | —                                  |
|                                 | Baseline to 14 d post RT | 16              | 0.7   | .98                             | —                                  |
| GRIX xerostomia total score     | Baseline to end of RT    | 20              | −0.9  | .93                             | <b>−22.2</b>                       |
|                                 | Baseline to 14 d post RT | 15              | −12.7 | .45                             | <b>−41.6</b>                       |
| GRIX sticky saliva daytime      | Baseline to end of RT    | 21              | −5.9  | .62                             | —                                  |
|                                 | Baseline to 14 d post RT | 16              | −23.1 | <b>.14</b>                      | <b>−34.6</b>                       |
| GRIX sticky saliva nighttime    | Baseline to end of RT    | 21              | −3.4  | .81                             | —                                  |
|                                 | Baseline to 14 d post RT | 16              | −21.9 | .22                             | <b>−28.0</b>                       |
| GRIX sticky saliva total score  | Baseline to end of RT    | 21              | −4.9  | .68                             | —                                  |
|                                 | Baseline to 14 d post RT | 16              | −22.6 | <b>.16</b>                      | <b>−33.4</b>                       |
| QLQ H&N pain                    | Baseline to end of RT    | 18              | 10.9  | .52                             | —                                  |
|                                 | Baseline to 14 d post RT | 10              | 12.3  | .65                             | —                                  |

|                         |                          |    |       |            |              |
|-------------------------|--------------------------|----|-------|------------|--------------|
| QLQ H&N swallowing      | Baseline to end of RT    | 17 | -16.2 | .23        | —            |
|                         | Baseline to 14 d post RT | 9  | -1.4  | .95        | —            |
| QLQ H&N teeth           | Baseline to end of RT    | 18 | 0.7   | .94        | —            |
|                         | Baseline to 14 d post RT | 11 | 5.5   | .62        | —            |
| QLQ H&N opening mouth   | Baseline to end of RT    | 18 | -11.0 | .44        | —            |
|                         | Baseline to 14 d post RT | 11 | -30.6 | <b>.19</b> | <b>-96.9</b> |
| QLQ H&N dry mouth       | Baseline to end of RT    | 18 | 9.3   | .63        | —            |
|                         | Baseline to 14 d post RT | 11 | 2.2   | .91        | <b>-83.8</b> |
| QLQ H&N sticky saliva   | Baseline to end of RT    | 18 | -1.1  | .94        | —            |
|                         | Baseline to 14 d post RT | 10 | -23.3 | <b>.17</b> | <b>-43.8</b> |
| QLQ H&N senses problems | Baseline to end of RT    | 18 | 18.2  | .01        | 4.9          |
|                         | Baseline to 14 d post RT | 11 | 22.1  | .02        | 7.8          |
| QLQ H&N coughing        | Baseline to end of RT    | 18 | 7.2   | .54        | —            |
|                         | Baseline to 14 d post RT | 11 | 21.3  | .33        | —            |
| QLQ H&N speech problems | Baseline to end of RT    | 17 | -5.5  | .64        | -24.2        |
|                         | Baseline to 14 d post RT | 9  | -9.4  | .68        | —            |
| QLQ H&N felt ill        | Baseline to end of RT    | 18 | -16.7 | .23        | —            |
|                         | Baseline to 14 d post RT | 11 | 10.4  | .64        | —            |

|                                     |                          |    |       |            |       |
|-------------------------------------|--------------------------|----|-------|------------|-------|
| QLQ H&N trouble with social contact | Baseline to end of RT    | 17 | 10.6  | .16        | —     |
|                                     | Baseline to 14 d post RT | 8  | 2.6   | .71        | —     |
| QLQ H&N trouble with social eating  | Baseline to end of RT    | 17 | -18.6 | <b>.12</b> | —     |
|                                     | Baseline to 14 d post RT | 7  | 10.8  | .52        | —     |
| QLQ H&N less sexuality              | Baseline to end of RT    | 16 | -14.9 | <b>.20</b> | —     |
|                                     | Baseline to 14 d post RT | 8  | -9.5  | .65        | —     |
| QLQ H&N pain killers                | Baseline to end of RT    | 17 | 21.1  | .21        | 20.9  |
|                                     | Baseline to 14 d post RT | 10 | 1.3   | .95        | —     |
| QLQ H&N nutritional supplements     | Baseline to end of RT    | 17 | 10.2  | .67        | —     |
|                                     | Baseline to 14 d post RT | 10 | 43.3  | .38        | -11.9 |
| QLQ H&N feeding tube                | Baseline to end of RT    | 17 | 9.7   | .64        | —     |
|                                     | Baseline to 14 d post RT | 10 | 16.7  | .62        | 15.1  |
| QLQ H&N weight loss                 | Baseline to end of RT    | 17 | -29.2 | .26        | —     |
|                                     | Baseline to 14 d post RT | 10 | -14.0 | .73        | —     |
| QLQ H&N weight gain                 | Baseline to end of RT    | 17 | 3.5   | .84        | —     |

---

|                          |    |      |     |       |
|--------------------------|----|------|-----|-------|
| Baseline to 14 d post RT | 10 | 12.7 | .68 | -12.8 |
|--------------------------|----|------|-----|-------|

---

Abbreviations: GRIX, Groningen Radiation-Induced Xerostomia; QLQ H&N, European Organization for Research and Treatment of Cancer Quality of Life Questionnaire Head and Neck; RT, radiotherapy.

<sup>a</sup> To avoid overfitting, models are adjusted only for RT intent.

<sup>b</sup> Bold indicates that the *P* value favors the NAC arm.

<sup>c</sup> Lasso models include arm, age, sex, RT intent, primary tumor site, chemotherapy treatment, and mean dose of salivary total as possible covariates. Dashes indicate arm was not selected in the lasso regression model.

**Supplemental Table 3.** Repeated Measures Model Results for Both the GRIX and QLQ H&N Surveys

| <b>Dependent Variable<sup>a</sup></b> | <b>Arm Estimate</b> | <b>Arm P Value<sup>b</sup></b> |
|---------------------------------------|---------------------|--------------------------------|
| GRIX xerostomia daytime               | 15.5                | <b>.05</b>                     |
| GRIX xerostomia nighttime             | 8.0                 | .33                            |
| GRIX xerostomia total score           | 14.3                | <b>.06</b>                     |
| GRIX sticky saliva daytime            | 20.1                | <b>.04</b>                     |
| GRIX sticky saliva nighttime          | 12.5                | <b>0.14</b>                    |
| GRIX sticky saliva total score        | 17.01               | <b>.05</b>                     |
| QLQ H&N pain                          | 5.3                 | 0.41                           |
| QLQ H&N swallowing                    | 14.3                | <b>.05</b>                     |
| QLQ H&N teeth                         | -0.3                | 0.73                           |
| QLQ H&N opening mouth                 | 11.4                | <b>0.07</b>                    |
| QLQ H&N dry mouth                     | 11.3                | 0.26                           |
| QLQ H&N sticky saliva                 | 18.9                | <b>.02</b>                     |
| QLQ H&N senses problems               | -4.1                | 0.43                           |
| QLQ H&N coughing                      | -0.04               | >.99                           |
| QLQ H&N speech problems               | 1.0                 | .90                            |
| QLQ H&N felt ill                      | 6.6                 | .29                            |
| QLQ H&N trouble with social contact   | -0.6                | .89                            |
| QLQ H&N trouble with social eating    | 8.3                 | .25                            |
| QLQ H&N less sexuality                | -2.1                | .78                            |
| QLQ H&N pain killers                  | 0.7                 | .94                            |
| QLQ H&N nutritional supplements       | 0.6                 | .96                            |
| QLQ H&N feeding tube                  | 11.0                | .39                            |
| QLQ H&N weight loss                   | 19.7                | <b>.02</b>                     |

QLQ H&N weight gain

-1.9

.72

---

Abbreviations: GRIX, Groningen Radiation-Induced Xerostomia; QLQ H&N, European Organization for Research and Treatment of Cancer Quality of Life Questionnaire Head and Neck; RT, radiotherapy.

<sup>a</sup> Models are adjusted for age, sex, RT intent, primary tumor site, chemotherapy treatment, and mean dose to salivary total.

<sup>b</sup> Bold indicates that the *P* value favors the NAC arm.

**Supplemental Figure.** Scores of European Organization for Research and Treatment of Cancer Quality of Life Questionnaire Head and Neck-35 Questions by Study Arm. A, Swallowing score (area under the curve for first 3 cycles,  $P=.17$ ). B, Sticky saliva score ( $P=.48$ ). C, Weight loss score ( $P=.28$ ). For cycle numbers, 0 indicates baseline; 1-8 indicate weekly measurements during RT; 9-11 indicate 14, 45, 90 days post RT, respectively. In figure, A indicates placebo group; B, NAC group. NAC indicates *N*-acetylcysteine; RT, radiotherapy.

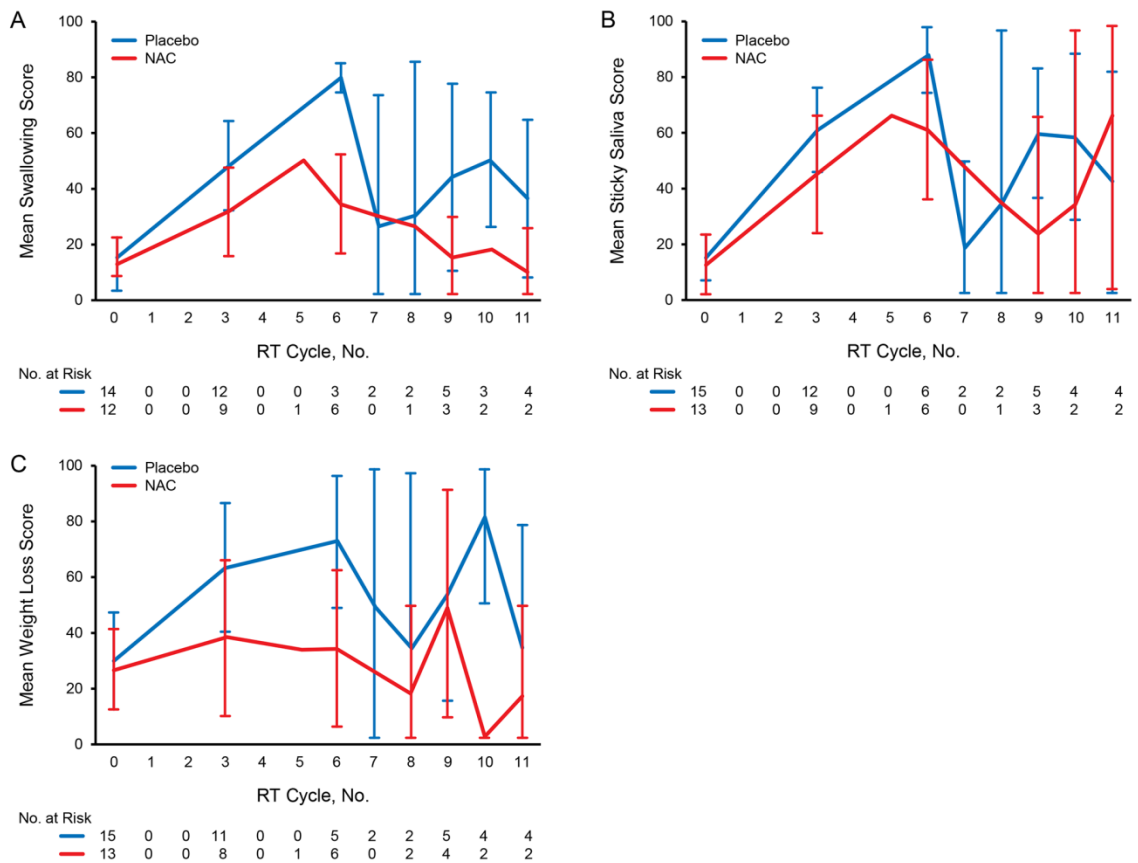

Supplement: NIHMS1528203-supplement-1.pdf [file NIHMS1528203-supplement-1.pdf]
